# Supplementary material
Source: ML conference proceedings conference paper supplement (https://proceedings.mlr.press/v48/hoiles16.html)
Supplement: Supplementary file 1 [file hoiles16-supp.pdf]

## Supplementary Material

*Proof of Theorem 1:* Follow the proof of Theorem 6 in (Maurer & Pontil, 2009) with the deterministic function  $f_\pi(x, a)$  given by (3) and the relations between  $f_\pi$  and  $v_\Phi^\pi$  given by (4).

*Proof Sketch of Theorem 2:* Write  $\hat{v}_\Phi^\pi$  as the estimated value from (2) given the dataset  $\mathcal{D}$ , policy  $\pi \in \Pi$ , and context distribution  $\mu(x)$ . Given the predicted reward  $\bar{r}(a, x)$  for  $(a, x) \notin \mathcal{D}$ , the estimated value of a policy  $\pi$  can be computed using:

$$\hat{v}_\Phi^\pi = \sum_{a,x} \mu(x) \pi(a, x) (\mathbf{1}\{n(a, x) = 0\} \bar{r}(a, x) + \mathbf{1}\{n(a, x) \neq 0\} \hat{r}(a, x))$$

with  $n(a, x) = \sum_{t=1}^T \mathbf{1}\{a_t = a, x_t = x\}$ . Take the expected value of  $\hat{v}_\Phi^\pi$  and utilize the law of iterative expectations to obtain

$$\mathbb{E}[\hat{v}_\Phi^\pi] = \sum_{a,x} \mu(x) \pi(a, x) (\mathbb{P}(n(a, x) = 0) \bar{r}(a, x) + \mathbb{P}(n(a, x) \neq 0) \hat{r}(a, x)). \quad (1)$$

Given the policy  $\pi(\cdot|x)$  and expected rewards  $\hat{r}(a, x)$  the actual value of a policy  $\pi$  is given by:

$$v_\Phi^\pi = \sum_{a,x} \mu(x) \pi(a, x) (\mathbb{P}(n(a, x) = 0) + \mathbb{P}(n(a, x) \neq 0)) r(a, x). \quad (2)$$

Subtracting (1) from (2), we obtain the result.

*Proof Sketch of Theorem 3:* Use the law of total variance  $\mathbb{V}[\hat{v}_\Phi^\pi] = \mathbb{E}[\mathbb{V}[\hat{v}_\Phi^\pi | (a, x) \in \mathcal{D}]] + \mathbb{V}[\mathbb{E}[\hat{v}_\Phi^\pi | (a, x) \in \mathcal{D}]]$  and apply the same methods as the proof for Theorem 2.
